## Index of Authors and Titles (Vols 79–84)

- AGELOPOULOU, R., MAGRE, S., PATSAVOUDI, E. *and* JOST, A. Initial phases of the rat testis differentiation *in vitro* **83**, 15
- ANDERTON, B. H. *See* GODSAVE, S. F.
- ANDREW, A. *See* RAWDON, B. B.
- BAGUÑA, J. *See* SALÓ, E.
- BAKOWSKA, J. *See* FRANKEL, J.
- BARD, J. B. L. *and* FRENCH, V. Butterfly wing patterns: how good a determining mechanism is the simple diffusion of a single morphogen? **84**, 255
- BAULCOMBE, D., LAZARUS, C. *and* MARTIENSSEN, R. Giberellins and gene control in cereal aleurone cells **83 Supplement**, 119
- BEAZLEY, L. D. *See* COLEMAN, L. A.
- BECCHETTI, E., STABELLINI, G., CARUSO, A. *and* CARINCI, P. Exogenous glycosaminoglycans (GAG) are able to modulate avian skin differentiation (epithelial keratinization and feather formation) **82**, 25
- BECHTOL, K. B. Characterization of a cell-surface differentiation antigen of mouse spermatogenesis: timing and localization of expression by immunohistochemistry using a monoclonal antibody **81**, 93
- BECK, F. *See* HUXHAM, I. M.
- BELL, K. A. *See* ÈMERY, D. J.
- BELLAIRS, R. *See* MAREEL, M.
- BELLAIRS, R. *See* STERN, C. D.
- BELLAIRS, R. *and* VEINI, M. Experimental analysis of control mechanisms in somite segmentation in avian embryos. II. Reduction of material in the gastrula stages of the chick **79**, 183
- BENNETT, M. D. *See* HESLOP-HARRISON, J. S.
- BIRD, A. P. DNA methylation *versus* gene expression **83 Supplement**, 31
- BOLTON, V. N., OADES, P. J. *and* JOHNSON, M. H. The relationship between cleavage, DNA replication and gene expression in the mouse 2-cell embryo **79**, 139
- BOSTOCK, C. J. Chromosomal changes associated with changes in development **83 Supplement**, 7
- BOYD, S. M., HOOPER, M. L. *and* WYLLIE, A. H. The mode of cell death associated with cavitation in teratocarcinoma-derived embryoid bodies **80**, 63
- BRAASCH, E. *See* NORTHDURFT, W.
- BRADLEY, A. *See* KAUFMAN, M. H.
- BRAMMAR, W. J. *and* HADFIELD, C. A programme for the construction of a lambda phage **83 Supplement**, 75
- BRINSTER, R. L. *See* EBERT, K. M.
- BÜCHER, T. *See* WEST, J. D.
- CALVO, W. *See* NOTHDURFT, W.
- CARBONELL, F. *See* NOTHDURFT, W.
- CARINCI, P. *See* BECCHETTI, E.
- CARRINGTON, J. L. *and* FALLON, J. F. The stages of flank ectoderm capable of responding to ridge induction in the chick embryo **84**, 19
- CARUSO, A. *See* BECCHETTI, E.
- CHAMBERS, M. R. *See* LALLONE, R. L.
- CHAPCO, W. *See* ÈMERY, D. J.
- CHENEY, C. M. *and* LASH, J. W. An increase in cell-cell adhesion in the chick segmental plate results in a meristic pattern **79**, 1

- CHISHOLM, J. C. *See* FLEMING, T. P.
- COLEMAN, L.-A., DUNLOP, S. A. *and* BEAZLEY, L. D. Patterns of cell division during visual streak formation in the frog *Limnodynastes dorsalis* **83**, 119
- COLOMBELLI, B. *See* THIÉBAUD, CH. H.
- COLVÉE, E. *See* GARCÍA-PORRERO, J. A.
- CONTI DEVIRGILIIS, L., DINI, L. *and* RUSSO-CAIA, S. Electron microscopic evidence for the presence of an asialoglycoprotein receptor on isolated foetal rat hepatocyte surface **79**, 41
- CRAWLEY, A. *See* TAMARIN, A.
- CRIBBIN, F. A. *See* GEARING, A. J. H.
- CZOŁOWSKA, R. *See* WAKSMUNDZKA, M.
- DAVIDSON, D. Dermal cells form strong adhesions to the basement membrane during development of feather primordia in chick skin **84**, 149
- DE BRUYNE, G. *See* MAREEL, M.
- DELBOS, M., GIPOULOUX, J.-D. *and* SAIDI, N. The role of the glycoconjugates in the migration of anuran amphibian germ cells **82**, 119
- DEPARIS, P. *and* JAYLET, A. The role of endoderm in blood cell ontogeny in the newt *Pleurodeles waltl* **81**, 37
- DINI, L. *See* CONTI DEVIRGILIIS, L.
- DRAKE, C. *See* MEIER, S.
- DUNLOP, S. A. *See* COLEMAN, L.-A.
- DÜNNWALD, M. *See* WEST, J. D.
- EBERT, K. M., PAYNTON, B. V., MCKNIGHT, G. S. *and* BRINSTER, R. L. Translation and stability of ovalbumin messenger RNA injected into growing oocytes and fertilized ova of mice **84**, 91
- EDE, D. A. *See* GUMPEL-PINOT, M.
- EGUCHI, G. *See* HONDA, H.
- EKBLUM, P. *See* THESLEFF, I.
- ELLIS, R. J., GALLAGHER, T. F., JENKINS, G. I. *and* LENNOX, C. R. Photoregulation of the biosynthesis of ribulose biphosphate carboxylase **83 Supplement**, 163
- EMERY, D. J., BELL, K. A., CHAPCO, W. *and* STEEVES, J. D. Characterization of a reduced-eye mutant of the grasshopper, *Melanoplus sanguinipes* **83**, 189
- EPP, L. G. *See* FROST, S. K.
- EVANS, M. J. *See* KAUFMAN, M. H.
- FALLON, J. F. *See* CARRINGTON, J. L.
- FALLON, J. F. *See* TODT, W. L.
- FAWCETT, J. W., TAYLOR, J. S. H., GAZE, R. M., GRANT, P. *and* HIRST, E. Fibre order in the normal *Xenopus* optic tract, near the chiasma **83**, 1
- FERNANDEZ-TERAN, M. A. *and* HURLE, E. Syndactyly induced by Janus Green B in the embryonic chick leg bud: a reexamination **84**, 159
- FERNANDEZ-TERAN, M. A. *See* HURLE, J. M.
- FERRARI, P. A. *and* KOCH, W. E. Development of the iris in the chicken embryo I. A study of growth and histodifferentiation utilizing immunocytochemistry for muscle differentiation **81**, 153
- FERRARI, P. A. *and* KOCH, W. E. Development of the iris in the chicken embryo II. Differentiation of irideal muscles *in vitro* **81**, 169
- FLACH, G. *See* MARO, B.
- FLEMING, T. P., WARREN, P. D., CHISHOLM, J. C. *and* JOHNSON, M. H. Trophodermal processes regulate the expression of totipotency within the inner cell mass of the mouse expanding blastocyst **84**, 63
- FLIEDNER, T. M. *See* NOTHDURFT, W.
- FLINT, O. P. *See* GUMPEL-PINOT, M.
- FRANKEL, J., JENKINS, L. M., BAKOWSKA, J. *and* NELSEN, E. M. Mutational analysis of patterning of oral structures in *Tetrahymena* I. Effects of increased size on organization **82**, 41

- FRANKEL, J., NELSEN, E. M., BAKOWSKA, J. and JENKINS, L. M. Mutational analysis of patterning of oral structures in *Tetrahymena* II. A graded basis for the individuality of intracellular structural arrays **82**, 67
- FRENCH, V. The structure of supernumerary leg regenerates in the cricket **84**, 185
- FRENCH, V. See BARD, J. B. L.
- FROST, S. K., EPP, L. G. and ROBINSON, S. J. The pigmentary system of developing axolotls I. A biochemical and structural analysis of chromatophores in wild-type axolotls **81**, 105
- FROST, S. K., EPP, L. G. and ROBINSON, S. J. The pigmentary system of developing axolotls II. An analysis of the melanoid phenotype **81**, 127
- FULDNER, R. A., LIM, S.-S., GREASER, M. L. and LEMANSKI, L. F. Accumulation and localization of troponin-T in developing hearts of *Ambystoma mexicanum* **84**, 1
- GALLAGHER, T. F. See ELLIS, R. J.
- GARCÍA-PORRERO, J. A., COLVÉE, E. and OJEDA, J. L. Cell death in the dorsal part of the chick optic cup. Evidence for a new necrotic area **80**, 241
- GARDNER, R. L. An *in situ* cell marker for clonal analysis of development of the extra-embryonic endoderm in the mouse **80**, 251
- GARDNER, R. L. See NICHOLS, J.
- GAZE, R. M. See FAWCETT, J. W.
- GEARING, A. J. H., CRIBBIN, F. A. and HORTON, J. D. Restoration of the antibody response to sheep erythrocytes in thymectomized *Xenopus* implanted with MHC-compatible or MHC-incompatible thymus **84**, 287
- GEHRING, W. J. See WHITE, R. A. H.
- GIPOULOUX, J.-D. See DELBOS, M.
- GLADE, R. See HOLDER, N.
- GODSAVE, S. F., WYLIE, C. C., LANE, E. B. and ANDERTON, B. H. Intermediate filaments in the *Xenopus* oocyte: the appearance and distribution of cyokeratin-containing filaments **83**, 157
- GODSAVE, S. F., ANDERTON, B. H., HEASMAN, J. and WYLIE, C. C. Oocytes and early embryos of *Xenopus laevis* contain intermediate filaments which react with anti-mammalian vimentin antibodies **83**, 169
- GOODALL, H. and JOHNSON, M. H. The nature of intercellular coupling within the preimplantation mouse embryo **79**, 53
- GRANT, P. See FAWCETT, J. W.
- GREASER, M. L. See FULDNER, R. A.
- GRILLI, G. See NOTHDURFT, W.
- GUMPEL-PINOT, M., EDE, D. A. and FLINT, O. P. Myogenic cell movement in the developing avian limb bud in the presence and absence of the apical ectodermal ridge (AER) **80**, 105
- HADFIELD, C. See BRAMMAR, W. J.
- HALL, B. K. See VAN EXAN, R. J.
- HARRIS, A. K., STOPAK, D. and WARNER, P. Generation of spatially periodic patterns by a mechanical instability: a mechanical alternative to the Turing model **80**, 1
- HEASMAN, J. See GODSAVE, S. F.
- HEATH, J. K. See SHI, W.-K.
- HESLOP-HARRISON, J. S. and BENNETT, M. D. Chromosome order – possible implications for development **83 Supplement**, 51
- HIRST, E. See FAWCETT, J. W.
- HODGKIN, J. Switch genes and sex determination in the nematode *C. elegans* **83 Supplement**, 103
- HOLDER, N. and GLADE, R. Skin glands in the axolotl: the creation and maintenance of a spacing pattern **79**, 97
- HOLDER, N. and REYNOLDS, S. Morphogenesis of the amphibian limb blastema: the relationship between pattern and form **79**, 165
- HOLDER, N. and WEEKES, C. Regeneration of surgically created mixed-handed axolotl forelimbs: pattern formation in the dorsal-ventral axis **82**, 217

- HONDA, H., KODAMA, R., TAKEUCHI, T., YAMANAKA, H., WATANABE, K. and EGUCHI, G. Cell behaviour in a polygonal cell sheet **83 Supplement**, 313
- HOOPER, M. L. *See* BOYD, S. M.
- HORTON, J. D. *See* GEARING, A. J. H.
- HORTON, J. D. *See* LALLONE, R. L.
- HURLE, J. M. and FERNANDEZ-TERAN, M. A. Fine structure of the interdigital membranes during the morphogenesis of the digits of the webbed foot of the duck embryo **79**, 201
- HURLE, J. M. *See* FERNANDEZ-TERAN, M. A.
- HUXHAM, I. M. and BECK, F. Characterization of exocoelomic fluid protein from rat conceptuses cultured in rat and human sera: a measure of yolk sac activity during organogenesis **84**, 203
- ISHIZUYA-OKA, A. and MIZUNO, T. Intestinal cytodifferentiation *in vitro* of chick stomach endoderm induced by the duodenal mesenchyme **82**, 163
- ITO, K. and TAKEUCHI, T. The differentiation *in vitro* of the neural crest cells of the mouse embryo **84**, 49
- JAHODA, C. A. B. and OLIVER, R. F. Changes in hair growth characteristics following the wounding of vibrissa follicles in the hooded rat **83**, 81
- JAHODA, C. A. B. and OLIVER, R. F. Histological studies of the effects of wounding vibrissa follicles in the hooded rat **83**, 95
- JAHODA, C. A. B. and OLIVER, R. F. Vibrissa dermal papilla cell aggregative behaviour *in vivo* and *in vitro* **79**, 211
- JAYLET, A. *See* DEPARIS, P.
- JENKINS, G. I. *See* ELLIS, R. J.
- JENKINS, L. M. *See* FRANKEL, J.
- JOHNSON, M. H. and MARO, B. The distribution of cytoplasmic actin in mouse 8-cell blastomeres **82**, 97
- JOHNSON, M. H., McCONNELL, J. and VAN BLERKOM, J. Programmed development in the mouse embryo **83 Supplement**, 197
- JOHNSON, M. H. *See* BOLTON, V. N.
- JOHNSON, M. H. *See* FLEMING, T. P.
- JOHNSON, M. H. *See* GOODALL, H.
- JOHNSON, M. H. *See* MARO, B.
- JOST, A. *See* AGELOPOULOU, R.
- JURAND, A. *See* NEFF, A. W.
- KALFAYAN, L., WAKIMOTO, B. and SPRADLING, A. Analysis of transcriptional regulation of the *s38* chorion gene of *Drosophila* by P element-mediated transformation **83 Supplement**, 137
- KARASIEWICZ, J. *See* WAKSMUNDZKA, M.
- KAUFMAN, M. H., EVANS, M. J., ROBERTSON, E. J. and BRADLEY, A. Influence of injected pluripotential (EK) cells on haploid and diploid parthenogenetic development **80**, 75
- KELLY, P. *See* TREWAVAS, A. J.
- KENYON, R. E. *See* ZWAAN, J.
- KLUDKIEWICZ, B. *See* OLSZANSKA, B.
- KOCH, W. E. *See* FERRARI, P. A.
- KODAMA, R. *See* HONDA, H.
- KOMINAMI, T. Allocation of mesendodermal cells during early embryogenesis in the starfish, *Asterina pectinifera* **84**, 177
- KORNELUK, R. G. and LIVERSAGE, R. A. Effects of radius-ulna removal on forelimb regeneration in *Xenopus laevis* froglets **82**, 9
- RAMER, B. *See* RAWDON, B. B.
- RYSIAK, E. *See* WAKSMUNDZKA, M.
- UBOTA, H. *See* TAKEICHI, T.

- KUWADA, J. Y. Normal and abnormal development of an identified leech motor neuron **79**, 125
- KWONG, W. H. *and* TAM, P. P. L. The pattern of alkaline phosphatase activity in the developing mouse spinal cord **82**, 241
- LAING, N. G. Motor innervation of proximally rotated chick embryo wings **83**, 213
- LALLONE, R. L., CHAMBERS, M. R. *and* HORTON, J. D. Changes in antibody and complement production in *Xenopus laevis* during postmetamorphic development revealed in a primary *in vivo* or *in vitro* antibody response **84**, 191
- LANE, E. B. *See* GODSAVE, S. F.
- LASH, J. E. *See* CHENEY, C. M.
- LASSOTA, Z. *See* OLSZAŃSKA, B.
- LAZARUS, C. *See* BAULCOMBE, D.
- LEDHAM, I. M. *See* MILOS, N.
- LEE, J. *See* TAMARIN, A.
- LEHTONEN, E., WARTIOVAARA, J. *and* REIMA, I. Cell relationships during aggregation between preimplantation embryos and teratocarcinoma-derived cells **81**, 17
- LEMANSKI, L. F. *See* FULDNER, R. A.
- LENNOX, C. R. *See* ELLIS, R. J.
- LIM, S-S. *See* FULDNER, R. A.
- LINDQUIST, S. Heat shock – a comparison of *Drosophila* and yeast **83 Supplement**, 147
- LINKE, I. M. *See* WEST, J. D.
- LIVERSAGE, R. A. *See* KORNELUK, R. G.
- LU, Y. L., SOBIS, H., VAN HOVE, L. *and* VANDEPUTTE, M. Differentiation potentiality of rat visceral yolk sac in organ culture **80**, 127
- MACGREGOR, H. C. *and* SWAN, A. P. An introduction to Programmes for Development **83 Supplement**, 1
- MADEN, M. *and* MUSTAFA, K. The cellular contributions of blastema and stump to 180° supernumerary limbs in the axolotl **84**, 233
- MADHAVAN, K. *See* MADHAVAN, M. M.
- MADHAVAN, M. M. *and* MADHAVAN, K. Do larval epidermal cells possess the blueprint for adult pattern in *Drosophila*? **82**, 1
- MAGRE, S. *See* AGELOPOULOU, R.
- MALACINSKI, G. M. *See* NEFF, A. W.
- MAREEL, M., BELLAIRS, R., DE BRUYNE, G. *and* VAN PETEGHEM, M. C. Effect of microtubule inhibitors on the expansion of hypoblast and margin of overgrowth of chick embryos **81**, 273
- MARO, B. *See* JOHNSON, M. H.
- MARO, B. *and* PICKERING, S. J. Microtubules influence compaction in preimplantation mouse embryos **84**, 217
- MARO, B., JOHNSON, M. H., PICKERING, S. J. *and* FLACH, G. Changes in actin distribution during fertilization of the mouse egg **81**, 211
- MARTIENSSEN, R. *See* BAULCOMBE, D.
- MARTIN, R. *See* MINKOFF, R.
- MATELA, R. J. *See* RANSOM, R.
- MCCONNELL, J. *See* JOHNSON, M. H.
- MCKNIGHT, G. S. *See* EBERT, K. M.
- MCSHERRY, G. M. Mapping of cortical histogenesis in the ferret **81**, 239
- MEIER, S. *See* PACKARD, D. S.
- MEIER, S. *and* DRAKE, C. SEM localization of cell-surface-associated fibronectin in the cranium of chick embryos utilizing immunolabelled microspheres **80**, 175
- MEINHARDT, H. Models for positional signalling, the threefold subdivision of segments and the pigmentation pattern of molluscs **84 Supplement**, 289
- MILBURN, A. Stages in the development of cat muscle spindles **82**, 177

- MILOS, N., ZALIK, S. E., SANDERS, E. J. and LEDSHAM, I. M. Intercellular relationships during cavitation of aggregates of extraembryonic endoderm cells from gastrulating chick embryos **83**, 43
- MINKOFF, R. Cell cycle analysis of facial mesenchyme in the chick embryo I. Labelled mitoses and continuous labelling studies **81**, 49
- MINKOFF, R. and MARTIN, R. E. Cell cycle analysis of facial mesenchyme in the chick embryo. II. Label dilution studies and developmental fate of slow cycling cells **81**, 61
- MIZUNO, T. *See* ISHIZUYA-OKA, A.
- MÜLLER, W. P. *See* THIÉBAUD, CH. H.
- MÜLLER, U. Chromosomes and sex differentiation in eutherians **83 Supplement**, 41
- MÜLLER, W. A. Retinoid and pattern formation in a hydroid **81**, 253
- MUSTAFA, K. *See* MADEN, M.
- NEFF, A. W., WAKAHARA, M., JURAND, A. and MALACINSKI, G. M. Experimental analysis of cytoplasmic rearrangements which follow fertilization and accompany symmetrization of inverted *Xenopus* eggs **80**, 197
- NELSEN, E. M. *See* FRANKEL, J.
- NICHOLS, J. and GARDNER, R. L. Heterogeneous differentiation of external cells in individual isolated early mouse inner cell masses in culture **80**, 225
- NIJHOUT, H. F. Colour pattern modification by coldshock in Lepidoptera **81**, 287
- NOTHDÜRFT, W., BRAASCH, E., CALVO, W., PRÜMMER, O., CARBONELL, F., GRILLI, G. A. and FLIEDNER, T. M. Ontogeny of the granulocyte/macrophage progenitor cell (GM-CFC) pools in the beagle **80**, 87
- OADES, P. J. *See* BOLTON, V. N.
- ODELL, G. E. A mathematically modelled cytochrome cortex exhibits periodic  $Ca^{++}$ -modulated contraction cycles seen in *Physarum* shuttle streaming **83 Supplement**, 261
- OJEDA, J. L. *See* GARCÍA-PORRERO, J. A.
- OKADA, M. *See* TOGASHI, S.
- OLIVER, R. F. *See* JAHODA, C. A. B.
- OLSZAŃSKA, B., KLUDKIEWICZ, B. and LASSOTA, Z. Transcription and polyadenylation processes during early development of quail embryo **79**, 11
- OSTER, G. F. On the crawling of cells **83 Supplement**, 329
- PACKARD, D. S. and MEIER, S. Morphological and experimental studies of the somitomeric organization of the segmental plate in snapping turtle embryos **84**, 35
- PATSAVOUDI, E. *See* AGELOPOULOU, R.
- PAYNTON, B. V. *See* EBERT, K. M.
- PERRIMON, N. *See* WHITE, R. A. H.
- PICKERING, S. J. *See* MARO, B.
- PRÜMMER, O. *See* NOTHDÜRFT, W.
- RANSOM, R. and MATELA, R. J. Computer modelling of cell division during development using a topological approach **83 Supplement**, 233
- RAWDON, B. B., KRAMER, B. and ANDREW, A. The distribution of endocrine cell progenitors in the gut of chick embryos **82**, 131
- REIMA, I. *See* LEHTONEN, E.
- REYNOLDS, S. *See* HOLDER, N.
- ROBERTSON, E. J. *See* KAUFMAN, M. H.
- ROBINSON, S. J. *See* FROST, S. K.
- RUSSO-CAIA, S. *See* CONTI DEVIRGILLIIS, L.
- SAIDI, N. *See* DELBOS, M.
- SALÓ, E. and BAGUÑA, J. Regeneration and pattern formation in planarians I. The pattern of mitosis in anterior and posterior regeneration in *Dugesia (G) tigrina*, and a new proposal for blastema formation **83**, 63

- SANDERS, E. J. Labelling of basement membrane constituents in the living chick embryo during gastrulation **79**, 113
- SANDERS, E. J. *See* MILOS, N.
- SCHALEKAMP, M. *and* VAN GOOR, D. Haemoglobin and globin synthesis in the isolated primitive and definitive erythroid cells of embryos. Evidence for a non-clonal mechanism at the haemoglobin switch **84**, 125
- SCHLOSS, J. A. Subroutines in the programme of *Chlamydomonas* gene expression induced by flagellar regeneration **83 Supplement**, 89
- SEXTON, R. *See* TREWAVAS, A. J.
- SHI, W.-K. *and* HEATH, J. K. Apolipoprotein expression by murine visceral yolk sac endoderm **81**, 143
- SHIOJIRI, N. The origin of intrahepatic bile duct cells in the mouse **79**, 25
- SLACK, J. M. W. Regional biosynthetic markers in the early amphibian embryo **80**, 289
- SLACK, J. M. W. *In vitro* development of isolated ectoderm from axolotl gastrulae **80**, 321
- SMEDLEY, M. J. *and* STANISSTREET, M. Scanning electron microscopy of wound healing in rat embryos **83**, 109
- SOBIS, H. *See* LU, Y. L.
- SOLURSH, M. S. *See* SWALLA, B. J.
- SPRADLING, A. *See* KALFAYAN, L.
- STABELLINI, G. *See* BECCHETTI, E.
- STANISSTREET, M. *See* SMEDLEY, M. J.
- STEEVES, J. D. *See* EMERY, D. J.
- STERN, C. D. *and* BELLAIRS, R. The roles of node regression and elongation of the *area pellucida* in the formation of somites in avian embryos **81**, 75
- STOPAK, D. *See* HARRIS, A. K.
- SUGIYAMA, T. *See* TAKANO, J.
- SWALLA, B. J. *and* SOLURSH, M. S. Epithelial enhancement of connective tissue differentiation in explanted somites **79**, 243
- SWAN, A. P. *See* MACGREGOR, H. C.
- TAKANO, J. *and* SUGIYAMA, T. Genetic analysis of developmental mechanisms in hydra XII. Analysis of chimaeric hydra produced from a normal and slow-budding strain (L4) **80**, 155
- TAKEICHI, T. *and* KUBOTA, H. Structural basis of the activation wave in the egg of *Xenopus laevis* **81**, 1
- TAKEUCHI, T. *See* HONDA, H.
- TAKEUCHI, T. *See* ITO, K.
- TAM, P. P. L. The histogenetic capacity of tissues in the caudal end of the embryonic axis of the mouse **82**, 253
- TAM, P. P. L. *See* KWONG, W. H.
- TAMARIN, A., CRAWLEY, A., LEE, J. *and* TICKLE, C. Analysis of upper beak defects in chicken embryos following treatment with retinoic acid **84**, 105
- TARKOWSKI, A. K. *See* WAKSMUNDZKA, M.
- TAYLOR, J. S. H. *See* FAWCETT, J. W.
- THESLEFF, I. *See* EKBLÖM, P.
- THESLEFF, I. *and* EKBLÖM, P. Role of transferrin in branching morphogenesis, growth and differentiation of the embryonic kidney **82**, 147
- THIÉBAUD, CH. H., COLOMBELLI, B. *and* MÜLLER, W. P. Diploid gynogenesis in *Xenopus laevis* and the localization with respect to the centromere of the gene for *periodic albinism a<sup>P</sup>* **83**, 33
- TICKLE, C. *See* TAMARIN, A.
- TODT, W. L. *and* FALLON, J. F. Development of the apical ectodermal ridge in the chick wing bud **80**, 21
- TOGASHI, S. *and* OKADA, M. Arrest of intravitelline mitoses in *Drosophila* embryos by u.v. irradiation of the egg surface **80**, 43

- TREWAVAS, A. J., SEXTON, R. *and* KELLY, P. Polarity, calcium and abscission: molecular bases for developmental plasticity in plants **83 Supplement**, 179
- VAN BLERKOM, J. *See* JOHNSON, M. H.
- VAN EXAN, R. J. *and* HALL, B. K. Epithelial induction of osteogenesis in embryonic chick mandibular mesenchyme studied by transfilter tissue recombinations **79**, 225
- VAN GOOR, D. *See* SCHALEKAMP, M.
- VAN HOVE, L. *See* LU, Y. L.
- VAN PETEGHEM, M. C. *See* MAREEL, M.
- VANDEPUTTE, M. *See* LU, Y. L.
- VEINI, M. *See* BELLAIRS, R.
- WAKAHARA, M. *See* NEFF, A. W.
- WAKIMOTO, B. *See* KALFAYAN, L.
- WAKSMUNDZKA, M., KRYSIAK, E., KARASIEWICZ, J., CZOŁOWSKA, R. *and* TARKOWSKI, A. Autonomous cortical activity in mouse eggs controlled by a cytoplasmic clock **79**, 77
- WALLACE, H. The response of denervated axolotl arms to delayed amputation **84**, 303
- WARNER, P. *See* HARRIS, A. K.
- WARREN, P. D. *See* FLEMING, T. P.
- WARTIOVAARA, J. *See* LEHTONEN, E.
- WATANABE, K. *See* HONDA, H.
- WEEKES, C. *See* HOLDER, N.
- WESSELLS, N. K. *See* WRENN, J. T.
- WEST, J. D., BÜCHER, T., LINKE, I. M. *and* DÜNNWALD, M. Investigation of variability among mouse aggregation chimaeras and X-chromosome inactivation mosaics **84**, 309
- WHITE, R. A. H., PERRIMON, N. *and* GEHRING, W. J. Differentiation markers in the *Drosophila* ovary **84**, 275
- WRENN, J. T. *and* WESSELLS, N. K. The early development of mystacial vibrissae in the mouse **83**, 137
- WYLIE, C. C. *See* GODSAVE, S. F.
- WYLLIE, A. H. *See* BOYD, S. M.
- YAMANAKA, H. *See* HONDA, H.
- YASUGI, S. Differentiation of allantoic endoderm implanted into the presumptive digestive area in avian embryos. A study with organ-specific antigens **80**, 137
- ZALIK, S. E. *See* MILOS, N.
- ZWAAN, J. *and* KENYON, R. E. Cell replication and terminal differentiation in the embryonic chicken lens: normal and forced initiation of lens fibre formation **84**, 331
